# Supplementary material
Source: Springer Nature journal article supplement (https://www.springermedizin.de/resource/supplementary/12872_2014_773_MOESM7_ESM.pdf/9430460)

**A**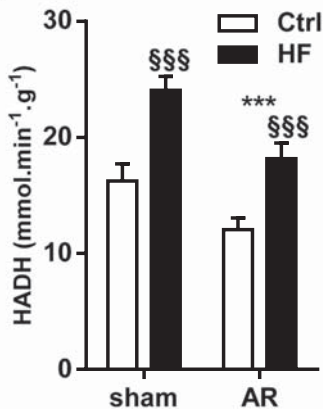**B**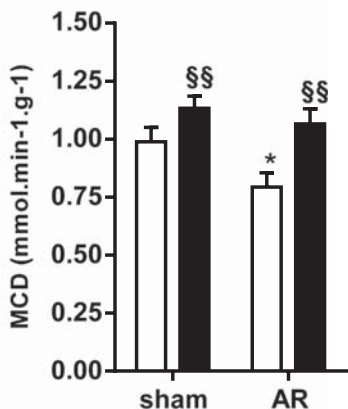**C**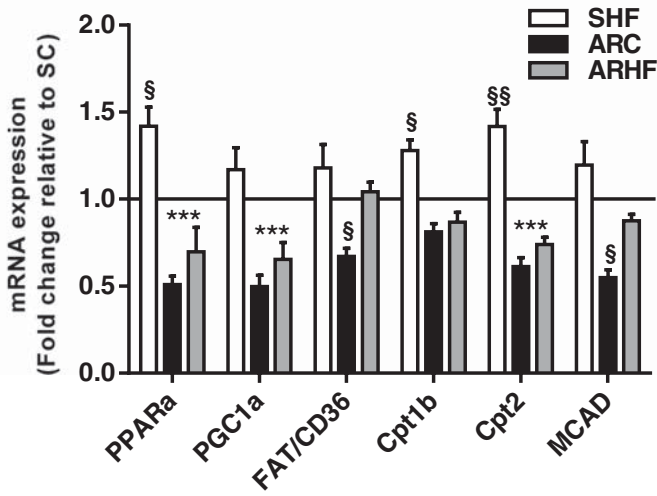

Supplement: MOESM7 [file 9430460]
